# Supplementary material for: Antioxidant and copper-chelating power of new molecules suggested as multiple target agents against Alzheimer's disease. A theoretical comparative study
Source: Royal Society of Chemistry journal article supplement (doi:10.1039/d2cp01918c), 2022-01-01
Supplement: d2cp01918c1.pdf [file d2cp01918c1.pdf]

## Supplementary information

### Antioxidant and Copper Chelating Power of New Molecules Proposed as Combined Multiple Targets Agent Against Alzheimer's Disease

Maciej Spiegel<sup>1</sup>, Tiziana Marino<sup>1</sup>, Mario Prejanò<sup>2</sup> and Nino Russo<sup>1</sup>

<sup>1</sup> *Dipartimento di Chimica e Tecnologie Chimiche, Università della Calabria, I-87136 Rende (CS), Italy*

<sup>2</sup> *Department of Organic Chemistry, Arrhenius Laboratory, Stockholm University, Stockholm SE-10691, Sweden*

Table S1. Bond distances (Å) in the different complexes for L<sub>1</sub>(L<sub>1</sub><sup>-</sup>) and L<sub>2</sub>(L<sub>2</sub><sup>-</sup>).

| L <sub>1</sub> (L <sub>1</sub> <sup>-</sup> ) |               |                    |               |                    |                |
|-----------------------------------------------|---------------|--------------------|---------------|--------------------|----------------|
| Bond                                          | Distance      | Bond               | Distance      | Bond               | Distance       |
| N3                                            |               | O,O                |               | N,O                |                |
| Cu-N <sub>1</sub>                             | 2.420 (2.208) | Co-O <sub>1</sub>  | 1.931 (1.911) | Cu-N <sub>1</sub>  | 2.273 (2.131)  |
| Cu-N <sub>4</sub>                             | 2.068 (2.228) | Cu-O <sub>6</sub>  | 2.862 (2.281) | Cu-N <sub>4</sub>  | 2.048 ((2.254) |
| Cu-N <sub>7</sub>                             | 2.098 (2.015) | Cu-O <sub>w1</sub> | 2.264 (2.428) | Cu-N <sub>7</sub>  | 2.193 (2.035)  |
| Cu-O <sub>w1</sub>                            | 2.148 (2.015) | Cu-O <sub>w2</sub> | 2.433 (2.335) | Cu-O <sub>1</sub>  | 2.812 (1.957)  |
| Cu-O <sub>w2</sub>                            | 2.187 (3.055) | Cu-O <sub>w3</sub> | 2.086 (2.152) | Cu-O <sub>w1</sub> | 2.084 (3.171)  |
| Cu-O <sub>w3</sub>                            | 3.086 (3.508) | Cu-O <sub>w4</sub> | 2.196 (2.375) | Cu-O <sub>w2</sub> | 2.355 (3.292)  |
| L <sub>2</sub> (L <sub>2</sub> <sup>-</sup> ) |               |                    |               |                    |                |
| Bond                                          | Distance      | Bond               | Distance      |                    |                |
| N4                                            |               | O,O                |               |                    |                |
| Cu-N <sub>1</sub>                             | 3.699 (3.712) | Co-O <sub>1</sub>  | 2.536 (1.918) |                    |                |
| Cu-N <sub>4</sub>                             | 2.085 (2.098) | Cu-O <sub>6</sub>  | 2.844 (2.343) |                    |                |
| Cu-N <sub>7</sub>                             | 3.641 (3.638) | Cu-N <sub>7</sub>  |               |                    |                |
| Cu-N <sub>10</sub>                            | 2.073(2.066)  | Cu-O <sub>w1</sub> | 2.033 (2.537) |                    |                |
| Cu-O <sub>w1</sub>                            | 2.051 (2.093) | Cu-O <sub>w2</sub> | 2.244         |                    |                |
| Cu-O <sub>w2</sub>                            | 2.103 (3.827) | Cu-O <sub>w3</sub> | 2.275 (2.031) |                    |                |
| Cu-O <sub>w3</sub>                            | (2.098)       | Cu-O <sub>w4</sub> | 1.993 (2.423) |                    |                |

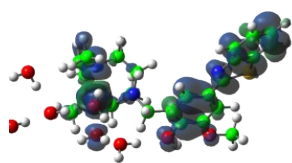

$L_1(N3)$

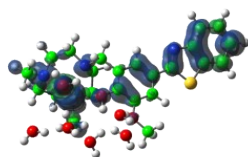

$L_1(N3,O)$

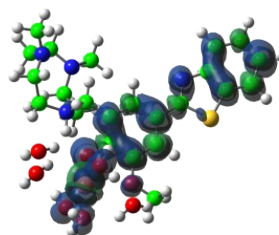

$L_1(O,O)$

**a**

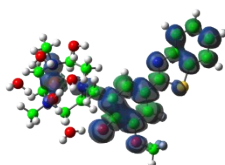

$L_1^-(N3)$

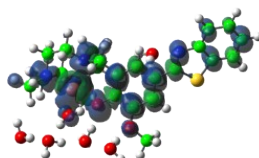

$L_1^-(N3,O)$

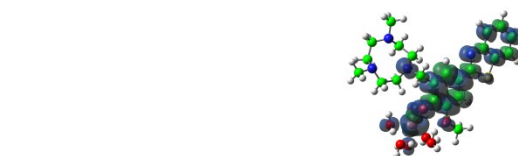

$L_1^-(O,O)$

**b**

Figure S1. Spin density distribution for Cu- $L_1$  (a) and Cu- $L_1^-$  (b) complexes.

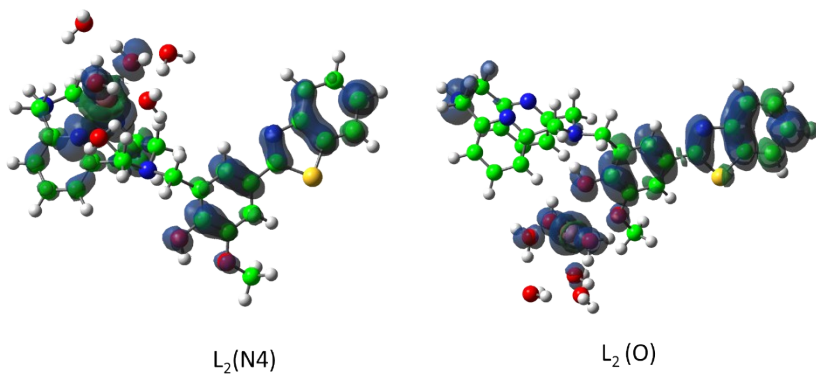

**a**

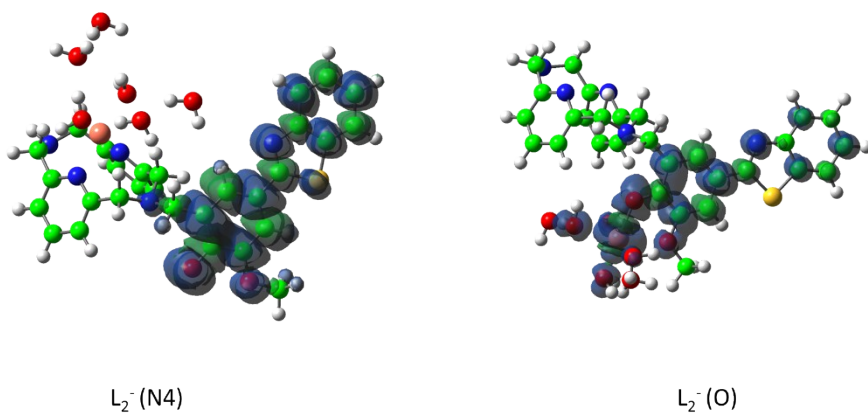

**b**

Figure S2. Spin density distribution for Cu-L<sub>2</sub> (a) and Cu-L<sub>2</sub><sup>-</sup> (b) complexes.

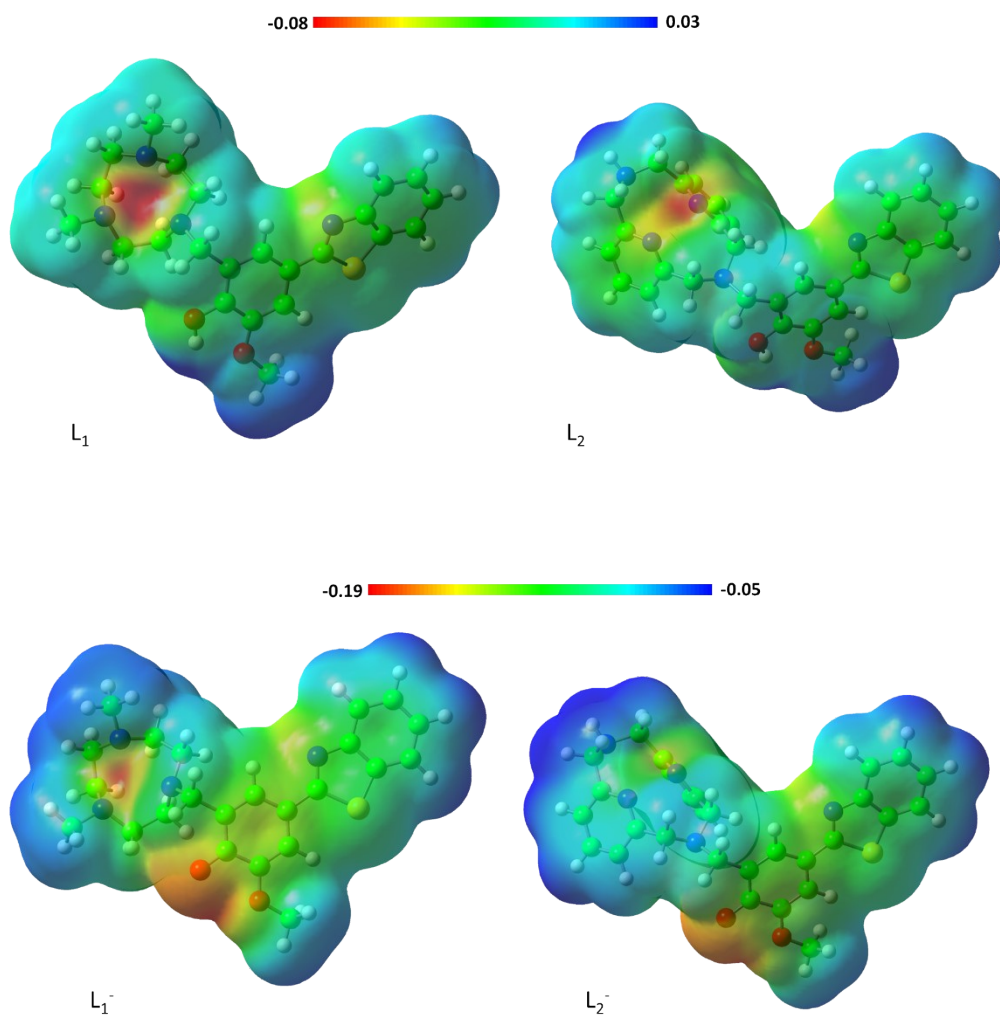

Figure S3. Molecular electrostatic potential maps for neutral and anionic considered species.
